# Supplementary material
Source: bioRxiv or medRxiv preprint supplement (https://www.biorxiv.org/highwire/filestream/27190/field_highwire_adjunct_files/11/094060-3.pdf)

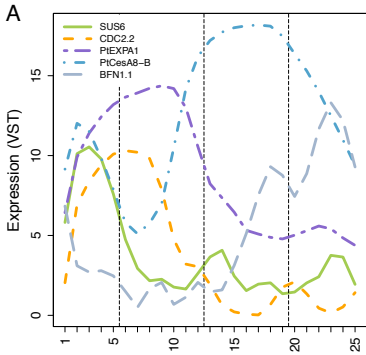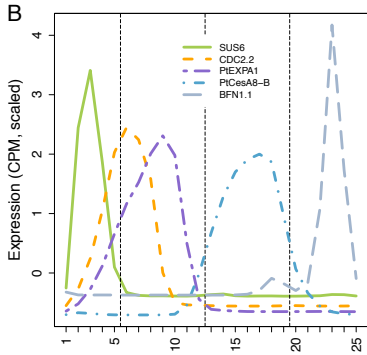

Supplement: Supplementary file [file 094060-3.pdf]
